# Supplementary material for: Use of sodium–glucose cotransporter 2 inhibitors in Alberta adults with chronic kidney disease: a cross-sectional study identifying care gaps to inform knowledge translation
Source: PubMed Central journal article supplement — CMAJ Open. 2023 Jan 31;11(1):E101–9. doi: 10.9778/cmajo.20210281 (PMC9894653; doi:10.9778/cmajo.20210281), 2023-01-31
Supplement: open-2021-0281-original-submission.pdf [file open-2021-0281-original-submission.pdf]

1  
2  
3  
4  
5  
6  
7  
8  
9  
10  
11  
12  
13  
14  
15  
16  
17  
18 **SGLT2i use in adults with chronic kidney disease: A cross-sectional study identifying care gaps**  
19 **to inform knowledge translation**

20  
21 Darren Lau MD/PhD FRCPC<sup>1</sup>, Neesh Pannu MD SM FRCPC<sup>1</sup>, Roseanne O. Yeung MD MPH  
22 FRCPC<sup>1</sup>, Nairne Scott-Douglas MD PhD FRCPC<sup>2</sup>, Scott Klarenbach MD MSc FRCPC<sup>1</sup>  
23

24 <sup>1</sup> Department of Medicine, University of Alberta, Edmonton, Alberta, Canada

25 <sup>2</sup> Department of Medicine, University of Calgary, Calgary, Alberta, Canada  
26  
27  
28  
29  
30

31 October 27, 2021

32  
33 Correspondence:

34  
35 Dr. Darren Lau  
36 5-112 Clinical Sciences Bldg  
37 11350-83 Ave NW  
38 University of Alberta  
39 Edmonton, AB T6G 2G3  
40 Tel: 780-492-7387  
41 Fax: 780-492-7277  
42 Email: [darren.lau@ualberta.ca](mailto:darren.lau@ualberta.ca)

43 Abstract: 244 words

44 Manuscript: 2462 words  
45  
46  
47  
48  
49  
50  
51  
52  
53  
54  
55  
56  
57  
58  
59  
60

1  
2  
3  
4  
5  
6  
7  
8  
9  
10  
11  
12  
13  
14  
15  
16  
17  
18  
19  
20  
21  
22  
23  
24  
25  
26  
27  
28  
29  
30  
31  
32  
33  
34  
35  
36  
37  
38  
39  
40  
41  
42  
43  
44  
45  
46  
47  
48  
49  
50  
51  
52  
53  
54  
55  
56  
57  
58  
59  
60

## **Abstract**

**Background** – Recent trials have shown important kidney and cardiovascular benefits of SGLT-2 inhibitors (SGLT2i) in adults with chronic kidney disease (CKD).

**Objectives** – Among adults with diabetes, characterize the prevalence of CKD (based on trial and guideline criteria), and assess SGLT2i use and its predictors.

**Methods** – Cross-sectional study using Alberta administrative data in adults with diabetes in 2019. CKD was defined as eGFR < 90 with  $\geq$  moderate proteinuria, or eGFR < 60. The associations of sociodemographics, comorbidities, and health care utilization on SGLT2i use were identified using logistic regression.

**Results** – We identified 446,315 adults with diabetes, of whom 76,630 (17%) were CKD-indicated for SGLT2i. Combined with cardiovascular disease and heart failure, total SGLT2i-eligibility (adults with cardio-renal benefit) was 37%. In contrast, SGLT2i use was 7% in those with CKD. CKD, older age, lower HbA1c, female sex, lower neighbourhood income, and hospital admission were among variables associated with less SGLT2i use. Family physician visits were associated with greater SGLT2i use. Expanding our perspective to all adults, with and without diabetes, at least 162,012 individuals with CKD (5% of all Alberta adults) will eventually benefit from SGLT2i.

**Conclusions** – A substantial number of adults with CKD, both with and without diabetes, would derive heart and kidney benefits from SGLT2i. Efforts will be needed to address barriers among adults with CKD, particularly related to older age and lower income; enhance primary care; and promote greater awareness of the heart and kidney benefits of SGLT2i independent from glycemic control.

## **Background**

Chronic kidney disease (CKD) is a risk factor for end-stage renal disease, and is associated with worse cardiovascular outcomes.<sup>1</sup> The CREDENCE and DAPA-CKD trials showed that sodium-glucose cotransporter-2 inhibitors (SGLT2i) reduced clinically meaningful kidney outcomes and cardiovascular events in adults both with <sup>2,3</sup> and without diabetes.<sup>3</sup> SGLT2i are now recommended in diabetes guidelines for end-organ protection in patients with CKD.<sup>4-6</sup> Similar recommendations are expected in adults without diabetes, particularly if similar results are observed in the forthcoming EMPA-KIDNEY trial of empagliflozin.<sup>7</sup>

As SGLT2i are already indicated in adults with diabetes for glycemic control, atherosclerotic cardiovascular disease (CVD), and heart failure, the incremental impact of the CKD indication for SGLT2i among those with diabetes is unknown. In this context, we define the “CKD indication” for SGLT2i specifically as meeting trial and guideline-based criteria for cardiorenal benefit from SGLT2i on the basis of estimated glomerular filtration rate (eGFR) or proteinuria. The Alberta Kidney Health Strategic Clinical Network<sup>8</sup> has identified improving SGLT2i use in adults with CKD as an emerging clinical priority. As a first step in these efforts, we examined a cross-section of adults with diabetes, to answer the following questions: (1) What is the prevalence of “SGLT2i-eligible adults”, i.e.: those who have been shown to benefit (in addition to blood glucose control) from SGLT2i according to recent trials and guidelines? (2) What is the incremental effect of the CKD indication alone on SGLT2i eligibility? (3) Among current users of SGLT2i, are sociodemographic factors, health status, diabetes status, and health care utilization associated with SGLT2i use? We examined predictors of SGLT2i use to identify potential directions and opportunities to accelerate SGLT2i use in adults with CKD. (4) What is the

1  
2  
3  
4  
5  
6  
7  
8  
9 prevalence of the CKD indication for SGLT2i in the general Alberta population, both with and  
10 without diabetes? The prevalence of the CKD indication in all Albertan adults, regardless of  
11 diabetes status, will foreshadow the magnitude of the knowledge translation challenge to  
12 come.  
13  
14  
15  
16  
17  
18

### 19 **Methods**

20  
21 We performed a cross-sectional study using data from the Alberta Kidney Disease Network,  
22 comprised of linked administrative databases of Alberta Health over the period April 1, 2002-  
23 March 31, 2019 (see Supplement).<sup>9</sup>  
24  
25  
26

#### 27 **Defining SGLT2i-eligibility and the CKD indication for SGLT2i**

28  
29 For adults with diabetes, indications for SGLT2i were defined as (1) CVD, (2) heart failure, and  
30 (3) CKD, and (4) glycemic control (see Table 1 for detailed definitions). Indications (1) through  
31 (3) were considered “end-organ” indications with evidence of clinically important benefits  
32 (kidney, cardiovascular, mortality) beyond glycemic control. Indication (3) was the focus of this  
33 study. Both dapagliflozin and canagliflozin have formal indications for CKD; dapagliflozin’s  
34 indication covers adults both with and without diabetes. These indications are well supported  
35 by clinical trials and have also been adopted by the most recent Canadian guidelines. Notably,  
36 the CKD trials of dapagliflozin and canagliflozin included patients with severe proteinuria,  
37 though diabetes guidelines,<sup>5,6</sup> the KDIGO diabetic kidney disease guidelines,<sup>4</sup> and the Health  
38 Canada indication apply to “CKD” generally, presumably based on evidence from cardiovascular  
39 trials showing renal benefits agnostic to CKD stage and proteinuria.<sup>10,11</sup> Thus, we defined the  
40  
41  
42  
43  
44  
45  
46  
47  
48  
49  
50  
51  
52  
53  
54  
55  
56  
57  
58  
59  
60

Commented [DL1]: Previously written as moderate

1  
2  
3  
4  
5  
6  
7  
8  
9  
10 CKD indication as (3a) eGFR  $\geq$  25mL/min/1.73m<sup>2</sup> and  $<$  90mL/min/1.73m<sup>2</sup> with evidence of  
11 severe or greater proteinuria (KDIGO A3, equivalent to UACR  $\geq$  30 mg/mmol), reflecting the  
12 kidney trial inclusion criteria; and (3b) eGFR  $\geq$  24mL/min/1.73m<sup>2</sup> and  $<$  60mL/min/1.73m<sup>2</sup>, or  
13 evidence of moderate or greater proteinuria (KDIGO A2, equivalent to UACR  $\geq$  3 mg/mmol),  
14 reflecting the broader guideline-based definition of CKD. Sub-indication (3a) was nested in (3b),  
15 the latter being more inclusive. Indication (4), glucose reduction, was defined as HbA1c  $\geq$  7%.  
16  
17 All current SGLT2i users, whatever their HbA1c and other SGLT2i indications, were also  
18 considered to be using SGLT2i for glucose lowering, presuming that very few adults in 2019  
19 would have been using SGLT2i for end-organ reasons alone.  
20  
21  
22  
23  
24  
25

#### 26 **Inclusion and exclusion criteria**

27  
28 We included all Alberta adults with diabetes on March 31, 2019, with at least one serum  
29 creatinine measurement between April 1, 2002 and the index date. Diabetes status was  
30 determined using an established administrative data definition.<sup>12,13</sup> We additionally classified  
31 patients with one or more HbA1c  $\geq$  6.5%,<sup>14</sup> or one or more pharmacy dispensations for insulin,  
32 as having diabetes. Patients with most recent eGFR  $<$  25mL/min/1.73m<sup>2</sup>, end-stage renal failure  
33 on dialysis, diagnostic codes specifying type 1 diabetes, or no indicators of proteinuria since  
34 2002 were excluded.  
35  
36  
37  
38  
39  
40  
41

#### 42 **Identifying adults with CKD and other SGLT2i indications**

43  
44 eGFR was estimated from serum creatinine using the CKD-Epi equations and categorized based  
45 on the most recent serum creatinine measurement, with at least 2 consecutive measurements  
46 meeting these criteria  $>$  90 days apart. Proteinuria was categorized using the most recent  
47  
48  
49  
50  
51

1  
2  
3  
4  
5  
6  
7  
8  
9  
10  
11  
12  
13  
14  
15  
16  
17  
18  
19  
20  
21  
22  
23  
24  
25  
26  
27  
28  
29  
30  
31  
32  
33  
34  
35  
36  
37  
38  
39  
40  
41  
42  
43  
44  
45  
46  
47  
48  
49  
50  
51  
52  
53  
54  
55  
56  
57  
58  
59  
60

community urine albumin:creatinine ratio (UACR), urine protein:creatinine ratio, or semi-quantitative urine dipstick interchangeably (see Supplement Table S1). CAD, stroke, and heart failure were defined using validated definitions.<sup>15</sup> All individuals with heart failure were considered to benefit from SGLT2i.

### **SGLT2i use and other study variables**

In Alberta, pharmacies report medication dispensations at the point of sale.<sup>16</sup> Patients were considered current SGLT2i users if, from their most recent dispensation, the day's supplied plus an additional 30 days for stockpile covered March 31, 2019.

Explanatory variables were sociodemographic quantities, diabetes indicators, other comorbidities,<sup>15,17</sup> Elixhauser comorbidity summary index,<sup>18</sup> and health care utilization (family physician [FP] visits, specialist visits, and hospitalizations) in the preceding year (Table 1).

### **Analysis**

The characteristics of included adults were described with means (sd) and proportions. We then reported the prevalence of each SGLT2i indication, and the proportion of SGLT2i use for each. The association of various characteristics on current SGLT2i use was determined using logistic regression in adults with diabetes, with variables added on in purposeful blocks, and statistically significant variables ( $p < 0.05$ ) retained. The regression was repeated in adults with CKD only as a subgroup. Finally, we broadened our focus to identify all adults in Alberta with  $\geq 1$  serum creatinine value since April 1, 2002, who met the CKD indication for SGLT2i (indication (3a) or (3b)), including adults both with or without diabetes. The prevalence of adults with the CKD indication in Alberta was calculated using the census-derived adult population of Alberta

1  
2  
3  
4  
5  
6  
7  
8  
9  
10 (3.5 million) as a denominator. The analysis was performed in Stata 17 (Stata Corp, College  
11 Station, TX). This study was approved by the research ethics boards at the Universities of  
12  
13 Alberta and Calgary.  
14  
15  
16  
17

## 18 **Results**

### 19 20 **Adults with diabetes with a CKD indication for SGLT2i were older, had more comorbidities,** 21 **and more frequent health care utilization**

22  
23 We identified 446,315 adults with diabetes (Figure 1). Included adults averaged 62 years old (sd  
24 15), with roughly equal males/females (Table 2). Mean HbA1c was 7.1% with the majority of  
25  
26 adults (61%) having HbA1c  $\leq$  7.0%. Mean eGFR was 80mL/min/1.73m<sup>2</sup>. Adults with diabetes  
27  
28 saw their FPs frequently (mean 5.5 visits per year). Contact with medical specialists was less  
29  
30 frequent (mean 0.5 visits per year). A substantial minority (10%) had been hospitalized in the  
31  
32 previous year.  
33  
34

35  
36 While there were 12,867 adults (3%) with diabetes with renal indices meeting inclusion criteria  
37  
38 for the SGLT2i renal outcome trials (indication 3a), a larger number of adults – 76,630 (17% of  
39  
40 all adults with diabetes) – met the broader guideline-based CKD definition (indication 3b) used  
41  
42 to guide SGLT2i initiation (Table 3). These individuals tended to be older, more likely to have  
43  
44 coronary artery disease, stroke, and heart failure, had more frequent healthcare utilization than  
45  
46 those not meeting the CKD indication for SGLT2i (Table 2). Differences in glycemic control were  
47  
48 minor.

### 49 **The CKD indication made an additional 11% of adults with diabetes “SGLT2i-eligible”**

1  
2  
3  
4  
5  
6  
7  
8  
9  
10  
11  
12  
13  
14  
15  
16  
17  
18  
19  
20  
21  
22  
23  
24  
25  
26  
27  
28  
29  
30  
31  
32  
33  
34  
35  
36  
37  
38  
39  
40  
41  
42  
43  
44  
45  
46  
47  
48  
49  
50  
51  
52  
53  
54  
55  
56  
57  
58  
59  
60

Though 17% of adults with diabetes met CKD criteria for SGLT2i, many of them already had CVD or heart failure. In fact, CVD was the most common end-organ indication for SGLT2i in adults with diabetes (26%) (Table 3). The combination of CVD and heart failure together identified 28% of adults with diabetes as having significant clinical benefit from SGLT2i (Figure 1). The total prevalence of adults with diabetes with cardiorenal benefit from SGLT2i was 37% after including CKD as an additional end-organ indication for SGLT2i. Thus, CKD increased SGLT2i-eligibility by an absolute increment of 9% in adults with diabetes.

If glucose reduction is included as an SGLT2i indication, albeit one without evidence of additional clinical benefits, then 55% of all adults with diabetes have an indication for SGLT2i.

#### **Use of SGLT2i was low among adults with CKD and other end-organ indications**

The overall rate of SGLT2i use was 8% (Table 3). SGLT2i use was highest in those for whom it was indicated for glucose control (24%). SGLT2i use by end-organ indication was lower: CVD (9%), HF (7%), CKD (7%).

#### **SGLT2i use was associated with multiple factors in adults with diabetes**

Among adults with diabetes, CKD was associated with slightly lower SGLT2i use (crude OR = 0.92), unchanged after adjustment (adjusted OR 0.91, 95% CI 0.88-0.95) (Table 4). The strongest associations with SGLT2i use were observed for HbA1c, age, and frequency of FP contact.

Those with HbA1c  $\leq$  7.0% had a lower odds of SGLT2i current use than those with HbA1c  $>$  7.0% (OR 0.23). Insulin use was also associated with higher odds of SGLT2i use. In terms of



1  
2  
3  
4  
5  
6  
7  
8  
9 other indications for SGLT2i, coronary artery disease increased the odds of SGLT2i use, but  
10 heart failure and stroke were associated with lower SGLT2i use.

11  
12  
13 The relationship between age and SGLT2i use was non-linear, with reduced use observed in  
14 young individuals and in patients aged 65 or above, but particularly at the upper extreme of  
15 age, with odds ratios as low as 0.13 (age  $\geq$  84 vs 55-64). Adults in lower quintiles of  
16 neighbourhood income also had lower odds of SGLT2i use, with a gradient observed from  
17 highest to lowest income quintile, the lowest income quintile being associated with an adjusted  
18 0.81-fold reduced odds of SGLT2i use compared to the highest. Among other sociodemographic  
19 variables, female sex was associated with reduced odds of SGLT2i use (OR = 0.73).

20  
21  
22  
23  
24  
25  
26  
27 Patients were more likely to be using SGLT2i with more frequent FP exposure (OR = 5.82 with >  
28 4 visits). Seeing a nephrologist in the previous year was associated with reduced SGLT2i use,  
29 while seeing a cardiologist, internist or endocrinologist exposure increased the odds of SGLT2i  
30 use. Hospital admission was associated with lower odds of SGLT2i use (OR 0.66). All of the  
31 above associations were statistically significant and were similar in models featuring only those  
32 adults with diabetes and concomitant CKD.

### 33 34 35 36 37 38 **Many adults *without* diabetes who meet the CKD indication would benefit from SGLT2i**

39  
40  
41 Among adults without diabetes, we identified 85,382 adults (Figure 1) who met the CKD  
42 indication for SGLT2i (indication 3b), 8,716 of whom individuals had severe proteinuria  
43 (indication 3a). Combined with the 76,630 similar adults with diabetes, the total number of  
44 Alberta adults who would have clinical benefits from SGLT2i due to CKD was 162,012,  
45 representing approximately 5% of Alberta's census-derived adult population of 3.5 million.

1  
2  
3  
4  
5  
6  
7  
8  
9  
10  
11  
12  
13  
14  
15  
16  
17  
18  
19  
20  
21  
22  
23  
24  
25  
26  
27  
28  
29  
30  
31  
32  
33  
34  
35  
36  
37  
38  
39  
40  
41  
42  
43  
44  
45  
46  
47  
48  
49  
50  
51  
52  
53  
54  
55  
56  
57  
58  
59  
60

## **Discussion**

We examined a provincial cross section of adults with diabetes. Among them, 17% met the CKD indication for clinical benefit from SGLT2i (an increment of 9% when considered in addition to well-established CVD and heart failure indications for SGLT2i), yet only 7% of these individuals were using SGLT2i. The CREDENCE trial had been published only 8 months prior to the index date. This study was therefore not meant to be evaluative, but, rather, to identify and explore this gap between current prescribing and the emerging evidence of cardiorenal benefit in CKD.

We observed a steady decline in SGLT2i use beyond 65 years, which includes most adults with CKD. SGLT2i are publicly funded in Alberta for all adults aged  $\geq 65$  by special authorization, primary for hyperglycemia.<sup>19</sup> Indeed, meeting glycemic control targets (HbA1c  $\leq 7.0\%$ ) was associated with a 4-fold reduced odds of SGLT2i use, consistent with the origin of SGLT2i's as anti-diabetes medications. A second explanation for lower SGLT2i use in older adults may be the perception of increased adverse event risk in these individuals.<sup>20</sup> SGLT2i do increase the risk of euglycemic DKA, and, possibly, lower limb amputations (hazard ratios  $\sim 2-3$ ), though the absolute background risks of these events are low ( $< 5/1000$  patient years).<sup>21-23</sup> These adverse events are probably less of a barrier for adults with CKD than concerns about orthostatic hypotension, acute kidney injury (AKI) and urinary tract infections, despite evidence showing no association between SGLT2i use and the latter two.<sup>24-26</sup> It will be important not to short-change older adults with cardiac and kidney comorbidities, who will benefit the most, in absolute terms, from SGLT2i. Efforts will be needed to facilitate access to SGLT2i for adults with CKD,

1  
2  
3  
4  
5  
6  
7  
8  
9  
10 irrespective of diabetes status and glycemic control, and to promote the understanding that  
11 these agents should be prescribed as kidney and heart medications.<sup>5,20</sup>  
12

13 Individuals residing in lower income neighbourhoods were less likely to be SGLT2i users. The  
14 reasons for this association may include lower access to employment-derived drug benefits,  
15 and competing acute issues.<sup>27</sup> Women were also less likely to be prescribed SGLT2i. Sex-based  
16 disparities exist with other cardiovascular risk-reducing medications,<sup>28</sup> though for SGLT2i, the  
17 disparity may simply be due to genital mycotic infections. Equitable access to SGLT2i will be an  
18 important consideration for quality improvement.<sup>29</sup>  
19  
20  
21  
22

23  
24  
25 FP exposure was associated with higher SGLT2i use. FP contacts were much more frequent than  
26 specialist contacts. Efforts to improve SGLT2i use in CKD-indicated adults will largely depend on  
27 further empowering and enhancing exposure to primary care providers alongside their  
28 specialist colleagues. Prescriber education and quality improvement initiatives will be needed  
29 to accelerate the evidence-based uptake of SGLT2 among those with CKD.<sup>20</sup> Hospital discharge  
30 may be an important opportunity to recommend or prescribe SGLT2i for a substantial minority  
31 of adults.<sup>30,31</sup>  
32  
33  
34  
35  
36  
37

### 38 **Limitations**

39  
40 First, missing measurements were common. Of the adults with diabetes and non-missing  
41 creatinine and proteinuria values included here, many of their proteinuria measurements were  
42 over 2 years old (33%). The prevalence of SGLT2i-indications will depend on how  
43 conscientiously they are sought out, and may be higher than estimated here. Second, these  
44 data precede the formal indication of CKD as an indication for SGLT2i, but our study is intended  
45  
46  
47  
48  
49  
50  
51  
52  
53  
54  
55  
56  
57  
58  
59  
60

1  
2  
3  
4  
5  
6  
7  
8  
9  
10  
11  
12  
13  
14  
15  
16  
17  
18  
19  
20  
21  
22  
23  
24  
25  
26  
27  
28  
29  
30  
31  
32  
33  
34  
35  
36  
37  
38  
39  
40  
41  
42  
43  
44  
45  
46  
47  
48  
49  
50  
51  
52  
53  
54  
55  
56  
57  
58  
59  
60

to provide anticipatory insights relevant to the eventual roll out of SGLT2i for as many as 5% of all adults.

**Conclusions**

Among adults with diabetes in Alberta, a substantial proportion (17%) meet the CKD indication for SGLT2i and would have important cardiorenal benefits apart from glucose reduction. In contrast, rates of SGLT2i use remain low (7%). Barriers to SGLT2i use will be important to address as SGLT2i are recast as kidney and heart medications, indicated equally for adults with and without diabetes. In Alberta, at least 5% of the total adult population (162,012 individuals) met the CKD-indication and would benefit from SGLT2i. Future efforts will need to address SGLT2i use in older adults, women, and those in lower income quintiles (including modifications to restrictive public drug insurance criteria); and promote the new understanding that SGLT2i are indicated for end-organ protection regardless of diabetes status or glycemic control.

## Acknowledgements

This study is based in part on data provided by Alberta Health and Alberta Health Services. The interpretation and conclusions contained herein are those of the researchers and do not necessarily represent the views of the Government of Alberta or Alberta Health Services.

Neither the Government of Alberta nor, Alberta Health or Alberta Health Services express any opinion in relation to this study.

This work was produced with in-kind support for new investigators from the Alberta Kidney Disease Network.

## Disclosures

RY has received funding from the Novo Nordisk Alberta Diabetes Fund (NOVAD), a research grant administered by the University Hospital Foundation and Alberta Economic Development & Trade. NS-D has received research funding from Amgen and Bristol Myers Squibb. He has also received speaking honoraria and consulting fees from Amgen, Alexion, AstraZeneca, Janssen Pharmaceuticals, Novartis, and Otsuka Pharmaceutical. Other authors have no relevant relationships, or financial, personal, or professional interests to disclose.

## Contributions

DL (corresponding author) conceived the study, analyzed the data, and wrote the manuscript. SWK obtained the data. All authors interpreted the results, made critical manuscript revisions, and approved the final manuscript for publication.

## References

1. Thompson S, James M, Wiebe N, et al. Cause of Death in Patients with Reduced Kidney Function. *J Am Soc Nephrol*. 2015;26:2504-11.
2. Perkovic V, Jardine MJ, Neal B, et al. Canagliflozin and Renal Outcomes in Type 2 Diabetes and Nephropathy. *N Engl J Med*. 2019;380:2295-306.
3. Heerspink HJL, Stefánsson BV, Correa-Rotter R, et al. Dapagliflozin in Patients with Chronic Kidney Disease. *N Engl J Med*. 2020;383:1436-46.
4. Navaneethan SD, Zoungas S, Caramori ML, et al. Diabetes Management in Chronic Kidney Disease: Synopsis of the 2020 KDIGO Clinical Practice Guideline. *Ann Intern Med*. 2021;174:385-94.
5. Lipscombe L, Butalia S, Dasgupta K, et al. Pharmacologic Glycemic Management of Type 2 Diabetes in Adults: 2020 Update. *Can J Diabetes*. 2020;44:575-91.
6. 9. Pharmacologic Approaches to Glycemic Treatment: Standards of Medical Care in Diabetes-2021. *Diabetes Care*. 2021;44:S111-s24.
7. Herrington WG, Preiss D, Haynes R, et al. The potential for improving cardio-renal outcomes by sodium-glucose co-transporter-2 inhibition in people with chronic kidney disease: a rationale for the EMPA-KIDNEY study. *Clin Kidney J*. 2018;11:749-61.
8. Pannu N, Gilmour L, Klarenbach S. Kidney Health Strategic Clinical Network: Driving positive change to optimize kidney health in Alberta. *CMAJ*. 2019;191:S39-s41.
9. Hemmelgarn BR, Clement F, Manns BJ, et al. Overview of the Alberta Kidney Disease Network. *BMC Nephrol*. 2009;10:30.
10. Wanner C, Inzucchi SE, Lachin JM, et al. Empagliflozin and Progression of Kidney Disease in Type 2 Diabetes. *N Engl J Med*. 2016;375:323-34.
11. Mosenson O, Wiviott SD, Cahn A, et al. Effects of dapagliflozin on development and progression of kidney disease in patients with type 2 diabetes: an analysis from the DECLARE-TIMI 58 randomised trial. *Lancet Diabetes Endocrinol*. 2019;7:606-17.
12. Hux JE, Ivis F, Flintoft V, Bica A. Diabetes in Ontario: determination of prevalence and incidence using a validated administrative data algorithm. *Diabetes Care*. 2002;25:512-6.
13. Public Health Agency of Canada. *Responding to the Challenge of Diabetes in Canada: First Report of the National Diabetes Surveillance System (NDSS) 2003*. Ottawa, ON: Health Canada; 2003.
14. Punthakee Z, Goldenberg R, Katz P. Definition, Classification and Diagnosis of Diabetes, Prediabetes and Metabolic Syndrome. *Can J Diabetes*. 2018;42 Suppl 1:S10-s5.
15. Tonelli M, Wiebe N, Fortin M, et al. Methods for identifying 30 chronic conditions: application to administrative data. *BMC Med Inform Decis Mak*. 2015;15:31.
16. Ye M, Vena JE, Johnson JA, Xu JY, Eurich DT. Validation of drug prescription records for senior patients in Alberta's Tomorrow Project: Assessing agreement between two population-level administrative pharmaceutical databases in Alberta, Canada. *Pharmacoepidemiol Drug Saf*. 2019;28:1417-21.
17. Tu K, Mitiku T, Lee DS, Guo H, Tu JV. Validation of physician billing and hospitalization data to identify patients with ischemic heart disease using data from the Electronic

- 1  
2  
3  
4  
5  
6  
7  
8  
9  
10 Medical Record Administrative data Linked Database (EMRALD). *Can J Cardiol.* 2010;26:e225-8.
- 11 18. van Walraven C, Austin PC, Jennings A, Quan H, Forster AJ. A modification of the  
12 Elixhauser comorbidity measures into a point system for hospital death using  
13 administrative data. *Med Care.* 2009;47:626-33.
- 14 19. Alberta Blue Cross. Interactive Drug Benefit List - Invokana 100mg oral tablet. 2021;  
15 [https://idbl.ab.bluecross.ca/idbl/drugDetails?\\_cid=aaaa45a5-5b28-4fc3-8e39-](https://idbl.ab.bluecross.ca/idbl/drugDetails?_cid=aaaa45a5-5b28-4fc3-8e39-db8c24b7d1d8&id=0000069762&intchg_grp_nbr=1&detailId=5071210)  
16 [db8c24b7d1d8&id=0000069762&intchg\\_grp\\_nbr=1&detailId=5071210](https://idbl.ab.bluecross.ca/idbl/drugDetails?_cid=aaaa45a5-5b28-4fc3-8e39-db8c24b7d1d8&id=0000069762&intchg_grp_nbr=1&detailId=5071210). Accessed 2021  
17 Sep 28.
- 18 20. Milder TY, Stocker SL, Baysari M, Day RO, Greenfield JR. Prescribing of SGLT2 inhibitors  
19 in primary care: A qualitative study of General Practitioners and Endocrinologists.  
20 *Diabetes Res Clin Pract.* 2021;180:109036.
- 21 21. Douros A, Lix LM, Fralick M, et al. Sodium-Glucose Cotransporter-2 Inhibitors and the  
22 Risk for Diabetic Ketoacidosis : A Multicenter Cohort Study. *Ann Intern Med.*  
23 2020;173:417-25.
- 24 22. Ueda P, Svanström H, Melbye M, et al. Sodium glucose cotransporter 2 inhibitors and  
25 risk of serious adverse events: nationwide register based cohort study. *BMJ.*  
26 2018;363:k4365.
- 27 23. Matthews DR, Li Q, Perkovic V, et al. Effects of canagliflozin on amputation risk in type 2  
28 diabetes: the CANVAS Program. *Diabetologia.* 2019;62:926-38.
- 29 24. Donnan JR, Grandy CA, Chibrikov E, et al. Comparative safety of the sodium glucose co-  
30 transporter 2 (SGLT2) inhibitors: a systematic review and meta-analysis. *BMJ Open.*  
31 2019;9:e022577.
- 32 25. Lega IC, Bronskill SE, Campitelli MA, et al. Sodium glucose cotransporter 2 inhibitors and  
33 risk of genital mycotic and urinary tract infection: A population-based study of older  
34 women and men with diabetes. *Diabetes Obes Metab.* 2019;21:2394-404.
- 35 26. Iskander C, Cherney DZ, Clemens KK, et al. Use of sodium-glucose cotransporter-2  
36 inhibitors and risk of acute kidney injury in older adults with diabetes: a population-  
37 based cohort study. *CMAJ.* 2020;192:E351-e60.
- 38 27. Hill-Briggs F, Adler NE, Berkowitz SA, et al. Social Determinants of Health and Diabetes:  
39 A Scientific Review. *Diabetes Care.* 2020;44:258-79.
- 40 28. Zhao M, Woodward M, Vaartjes I, et al. Sex Differences in Cardiovascular Medication  
41 Prescription in Primary Care: A Systematic Review and Meta-Analysis. *J Am Heart Assoc.*  
42 2020;9:e014742.
- 43 29. McAlister FA, Oreopoulos A, Norris CM, et al. Exploring the treatment-risk paradox in  
44 coronary disease. *Arch Intern Med.* 2007;167:1019-25.
- 45 30. Kosiborod M, Berwanger O, Koch GG, et al. Effects of dapagliflozin on prevention of  
46 major clinical events and recovery in patients with respiratory failure because of COVID-  
47 19: Design and rationale for the DARE-19 study. *Diabetes Obes Metab.* 2021;23:886-96.
- 48 31. Bhatt DL, Szarek M, Steg PG, et al. Sotagliflozin in Patients with Diabetes and Recent  
49 Worsening Heart Failure. *N Engl J Med.* 2021;384:117-28.
- 50  
51  
52  
53  
54  
55  
56  
57  
58  
59  
60

1  
2  
3  
4  
5  
6  
7  
8  
9  
10  
11  
12  
13  
14  
15  
16  
17  
18  
19  
20  
21  
22  
23  
24  
25  
26  
27  
28  
29  
30  
31  
32  
33  
34  
35  
36  
37  
38  
39  
40  
41  
42  
43  
44  
45  
46  
47  
48  
49  
50  
51  
52  
53  
54  
55  
56  
57  
58  
59  
60

**Figures**

Figure 1: Adults with diabetes and indications for SGLT2i

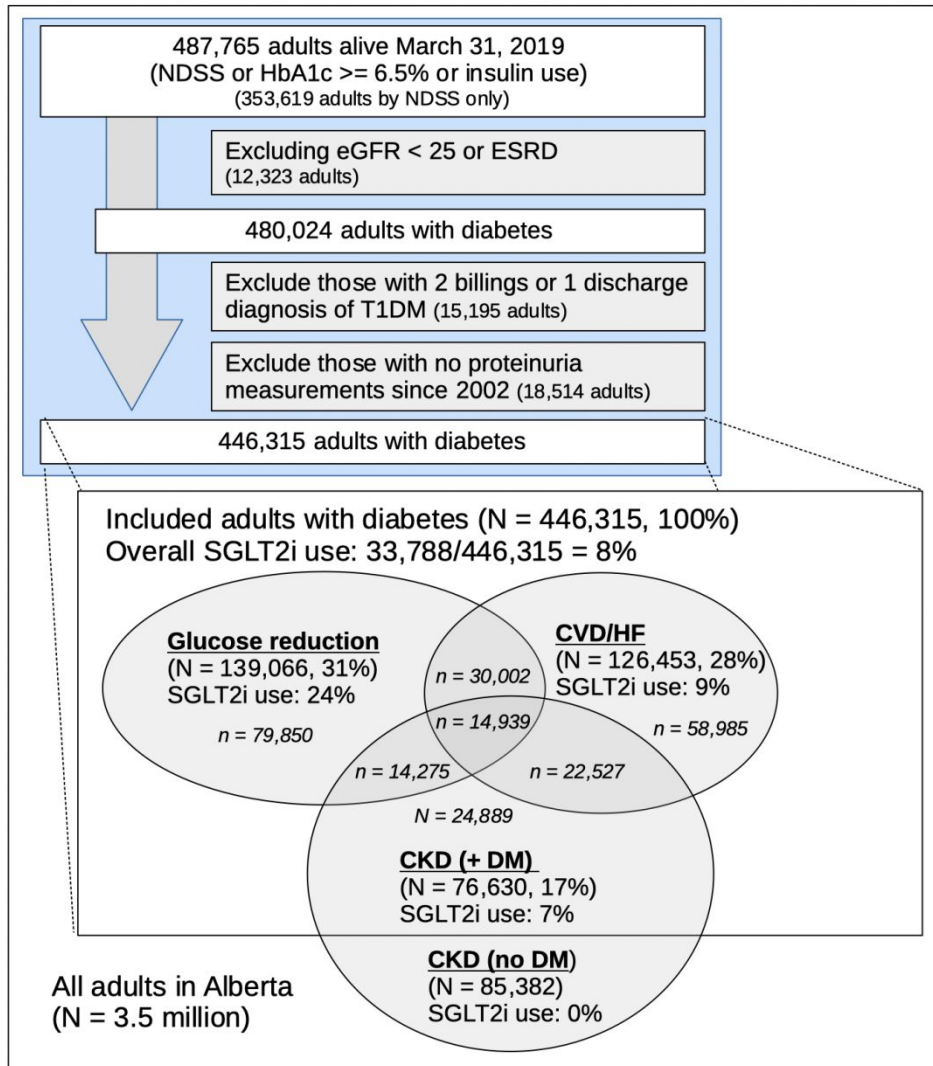

Encircled areas show SGLT2i-indications, in the style of a Venn diagram, and are not drawn to scale. Abbreviations: NDSS – National Diabetes Surveillance System, referring to a well accepted administrative-database case definition for diabetes, HbA1c – glycated hemoglobin, eGFR –



1  
2  
3  
4  
5  
6  
7  
8  
9  
10  
11  
12  
13  
14  
15  
16  
17  
18  
19  
20  
21  
22  
23  
24  
25  
26  
27  
28  
29  
30  
31  
32  
33  
34  
35  
36  
37  
38  
39  
40  
41  
42  
43  
44  
45  
46  
47  
48  
49  
50  
51  
52  
53  
54  
55  
56  
57  
58  
59  
60

estimated glomerular filtration rate, ESRD – end-stage renal disease, T1DM – type 1 diabetes, SGLT2i – sodium glucose-lowering co-transporter 2-inhibitor, CVD – cardiovascular disease, HF – heart failure, CKD – chronic kidney disease (per definitions in Table 1), DM – diabetes.

Confidential

**Tables**

Table 1: Indications for SGLT2i in adults with diabetes

|      | Indication       | Cardio-renal benefit? | Definition                                                                                                                                                                                                                                                                                             |
|------|------------------|-----------------------|--------------------------------------------------------------------------------------------------------------------------------------------------------------------------------------------------------------------------------------------------------------------------------------------------------|
| (1)  | CVD              | Yes                   | <ul style="list-style-type: none"> <li>• Patient has history of coronary artery disease or stroke</li> </ul>                                                                                                                                                                                           |
| (2)  | Heart failure    | Yes                   | <ul style="list-style-type: none"> <li>• Patient has history of heart failure</li> </ul>                                                                                                                                                                                                               |
| (3a) | CKD              | Yes                   | Based on inclusion criteria for SGLT2i renal outcome trials <ul style="list-style-type: none"> <li>• eGFR &lt; 90 mL/min/1.73m<sup>2</sup> with evidence of severe or greater proteinuria</li> <li>• eGFR ≥ 25 mL/min/1.73m<sup>2</sup></li> </ul>                                                     |
| (3b) | CKD <sup>a</sup> | Yes <sup>b</sup>      | Based on Diabetes Canada and KDIGO guidelines <ul style="list-style-type: none"> <li>• eGFR &lt; 60mL/min/1.73m<sup>2</sup> regardless of proteinuria, or moderate or greater proteinuria regardless of eGFR</li> <li>• eGFR ≥ 25 mL/min/1.73m<sup>2</sup></li> </ul>                                  |
| (4)  | Glucose lowering | No                    | Adults requiring additional pharmacotherapy as add-on to existing therapy, or as monotherapy if metformin is not tolerated, to meet glycemic targets. <ul style="list-style-type: none"> <li>• HbA1c &gt; 7.0%, or</li> <li>• Any HbA1c with current use of SGLT2i or GLP-1-RA <sup>c</sup></li> </ul> |

Collectively indications (1)-(3) are the “end-organ indications”, with dedicated trials showing kidney and cardiovascular benefits of SGLT2i in these patients.

<sup>a</sup> CKD criteria (3b) was also applied in this cross-sectional study to adults without diabetes.

<sup>b</sup> Benefits extrapolated from renal outcome trials, which enrolled adults meeting criteria (3a), and also shown in sub-group analyses of cardiovascular outcome trials showing renal benefit in adults with CKD not meeting criteria (3a). Indication (3b) is more inclusive and contains indication (3a) as a subset.

<sup>c</sup> On the presumption that all current users of SGLT2i or GLP-1RA have been started on it for glucose control, given low rates of SGLT2i / GLP-1RA use purely for end-organ interventions. Abbreviations: SGLT2i – Sodium-glucose lowering cotransporter-2 inhibitor. CVD – Cardiovascular disease. CKD – Chronic kidney disease. eGFR – estimated glomerular filtration rate (CKD-Epi). HbA1c – Hemoglobin A1c (glycated hemoglobin). eGFR – Estimated glomerular filtration rate.

Table 2: Characteristics of Alberta adults with diabetes, stratified by the presence or absence of the CKD indication for SGLT2i

| Variable                             | All adults with DM<br>(n = 469,829) |           | DM + CKD<br>(n = 90,316) |           | Diabetes with no CKD<br>indication<br>(n = 374,513) |           |     |
|--------------------------------------|-------------------------------------|-----------|--------------------------|-----------|-----------------------------------------------------|-----------|-----|
|                                      | n / mean                            | freq / SD | n / mean                 | freq / SD | n / mean                                            | freq / SD |     |
| <b>Sociodemographics</b>             |                                     |           |                          |           |                                                     |           |     |
| Age                                  | (mean, SD)                          | 62        | 15                       | 74        | 12                                                  | 60        | 14  |
| Sex                                  | Female                              | 212808    | 48%                      | 35932     | 47%                                                 | 176876    | 48% |
| Residence                            | Rural                               | 54697     | 12%                      | 10961     | 14%                                                 | 43736     | 12% |
| Neighbourhood income quintile        | 1                                   | 100047    | 23%                      | 18721     | 25%                                                 | 81326     | 23% |
|                                      | 2                                   | 90845     | 21%                      | 16678     | 22%                                                 | 74167     | 21% |
|                                      | 3                                   | 84445     | 20%                      | 14733     | 20%                                                 | 69712     | 20% |
|                                      | 4                                   | 83318     | 19%                      | 13425     | 18%                                                 | 69893     | 20% |
|                                      | 5                                   | 72009     | 17%                      | 11092     | 15%                                                 | 60917     | 17% |
| <b>Renal function</b>                |                                     |           |                          |           |                                                     |           |     |
| Serum creatinine (umol/L)            | (mean, SD)                          | 83        | 23                       | 108       | 28                                                  | 77        | 17  |
| eGFR (CKD-EPI)                       | (mean, SD)                          | 80        | 20                       | 55        | 16                                                  | 85        | 17  |
| CKD stage by eGFR                    | None / Stage 1                      | 160063    | 36%                      | 0         | 0%                                                  | 160063    | 43% |
|                                      | Stage 2                             | 238707    | 53%                      | 29085     | 38%                                                 | 209622    | 57% |
|                                      | Stage 3                             | 46297     | 10%                      | 46297     | 60%                                                 | 0         | 0%  |
|                                      | Stage 4                             | 1248      | 0%                       | 1248      | 2%                                                  | 0         | 0%  |
| Proteinuria                          | None / mild                         | 376565    | 84%                      | 32305     | 42%                                                 | 344260    | 93% |
|                                      | Moderate                            | 51551     | 12%                      | 31458     | 41%                                                 | 20093     | 5%  |
|                                      | Severe                              | 17173     | 4%                       | 12038     | 16%                                                 | 5135      | 1%  |
|                                      | Nephrotic                           | 1026      | 0%                       | 829       | 1%                                                  | 197       | 0%  |
| ACEi or ARB, current use             | Yes                                 | 184630    | 41%                      | 47264     | 62%                                                 | 137366    | 37% |
| <b>Diabetes characteristics</b>      |                                     |           |                          |           |                                                     |           |     |
| HbA1c                                | (mean, SD)                          | 7.1       | 1.6                      | 7.2       | 1.5                                                 | 7.1       | 1.6 |
| HbA1c                                | <= 7.0%                             | 201726    | 61%                      | 36425     | 56%                                                 | 165301    | 62% |
|                                      | 7.1% - 9.0%                         | 95703     | 29%                      | 21353     | 33%                                                 | 74350     | 28% |
|                                      | > 9.0%                              | 34447     | 10%                      | 6699      | 10%                                                 | 27748     | 10% |
| HbA1c                                | Missing                             | 114439    | --                       | 12153     | --                                                  | 102286    | --  |
| Insulin intensity                    | None                                | 383073    | 86%                      | 60365     | 79%                                                 | 322708    | 87% |
|                                      | Basal only                          | 26267     | 6%                       | 7028      | 9%                                                  | 19239     | 5%  |
|                                      | Bolus +/- basal                     | 36975     | 8%                       | 9237      | 12%                                                 | 27738     | 8%  |
| <b>Comorbidities</b>                 |                                     |           |                          |           |                                                     |           |     |
| Coronary artery disease              | Yes                                 | 89530     | 20%                      | 25896     | 34%                                                 | 63634     | 17% |
| Stroke                               | Yes                                 | 45260     | 10%                      | 15006     | 20%                                                 | 30254     | 8%  |
| Heart Failure                        | Yes                                 | 33239     | 7%                       | 15127     | 20%                                                 | 18112     | 5%  |
| Elixhauser index                     | (mean, SD)                          | 10        | 10                       | 16        | 11                                                  | 9         | 9   |
| <b>Health care utilization</b>       |                                     |           |                          |           |                                                     |           |     |
| FP - Number of visits                | (mean, SD)                          | 5.5       | 6.0                      | 6.9       | 7.5                                                 | 5.2       | 5.6 |
| FP visits - Any                      | >= 1                                | 385926    | 86%                      | 68675     | 90%                                                 | 317251    | 86% |
| FP visits - Frequency                | 0 visits                            | 60389     | 14%                      | 7955      | 10%                                                 | 52434     | 14% |
|                                      | 1-4 visits                          | 177319    | 40%                      | 25728     | 34%                                                 | 151591    | 41% |
|                                      | > 4 visits                          | 208607    | 47%                      | 42947     | 56%                                                 | 165660    | 45% |
| IM - Number of visits                | (mean, SD)                          | 0.3       | 1.0                      | 0.5       | 1.3                                                 | 0.3       | 1.0 |
| IM visits - Any                      | >= 1                                | 70290     | 16%                      | 16415     | 21%                                                 | 53875     | 15% |
| CARD - Number of visits              | (mean, SD)                          | 0.1       | 0.5                      | 0.2       | 0.7                                                 | 0.1       | 0.4 |
| CARD visits - Any                    | >= 1                                | 30219     | 7%                       | 8976      | 12%                                                 | 21243     | 6%  |
| ENDO - Number of visits              | (mean, SD)                          | 0.0       | 0.3                      | 0.0       | 0.3                                                 | 0.0       | 0.3 |
| ENDO visits - Any                    | >= 1                                | 6184      | 1%                       | 1158      | 2%                                                  | 5026      | 1%  |
| NEPH - Number of visits              | (mean, SD)                          | 0.0       | 0.2                      | 0.1       | 0.5                                                 | 0.0       | 0.1 |
| NEPH visits - Any                    | >= 1                                | 8541      | 2%                       | 6219      | 8%                                                  | 2322      | 1%  |
| NEPH / ENDO / IM / CARD visits       | (mean, SD)                          | 0.5       | 1.3                      | 0.8       | 1.8                                                 | 0.4       | 1.2 |
| NEPH / ENDO / IM / CARD visits - Any | >= 1                                | 98159     | 22%                      | 25671     | 33%                                                 | 72488     | 20% |
| Hospitalization                      | >= 1                                | 43047     | 10%                      | 11654     | 15%                                                 | 31393     | 8%  |

1  
2  
3  
4  
5  
6  
7  
8  
9  
10  
11  
12  
13  
14  
15  
16  
17  
18  
19  
20  
21  
22  
23  
24  
25  
26  
27  
28  
29  
30  
31  
32  
33  
34  
35  
36  
37  
38  
39  
40  
41  
42  
43  
44  
45  
46  
47  
48  
49  
50  
51  
52  
53  
54  
55  
56  
57  
58  
59  
60

All  $p \leq 0.001$  for comparisons between adults with and without a CKD indication for SGLT2i (T-test and  $\chi^2$  tests).

Abbreviations: DM – diabetes. CKD – chronic kidney disease. N – Number of adults. Freq – frequency. SD – standard deviation. eGFR – Estimated glomerular filtration rate. CAD – coronary artery disease. ACEi – angiotensin converting enzyme-inhibitor. ARB – angiotensin receptor blocker. HbA1c – Hemoglobin A1c / glycated hemoglobin. FP – family physician. IM – internal medicine physician. CARD – cardiologist. ENDO – endocrinologist. NEPH – nephrologist.

Confidential

Table 3: Indications for SGLT2i in adults with diabetes

| Indication number           | Indication                                                   | Number of adults with the indicated condition (proportion of all adults with diabetes) | SGLT2i users (proportion of SGLT2i users, out of adults with the specified indication) |
|-----------------------------|--------------------------------------------------------------|----------------------------------------------------------------------------------------|----------------------------------------------------------------------------------------|
|                             | All adults with diabetes                                     | 446,315 (100%)                                                                         | 33,788 / 446,315 = 8%                                                                  |
| Indications for SGLT2i      |                                                              |                                                                                        |                                                                                        |
| 1                           | CVD (CAD / stroke)                                           | 116,652 (26%)                                                                          | 10,446 / 116,652 = 9%                                                                  |
| 2                           | Heart failure                                                | 33,239 (7%)                                                                            | 2,271 / 33,239 = 7%                                                                    |
| 3a                          | CKD stage $\geq 2$ and at least severe proteinuria           | 12,867 (3%)                                                                            | 988 / 12,867 = 8%                                                                      |
| 3b                          | CKD stage $\geq 3$ or at least moderate proteinuria          | 76,630 (17%)                                                                           | 5,460 / 76,630 = 7%                                                                    |
| 4                           | Glycemic control (HbA1c $> 7.0\%$ or any current SGLT2i use) | 139,066 (31%)                                                                          | 33,788 / 139,066 = 24%                                                                 |
| Combinations of indications |                                                              |                                                                                        |                                                                                        |
| 1 or 2                      | CVD + heart failure                                          | 126,453 (28%)                                                                          | 11,037 / 126,453 = 9%                                                                  |
| 1 or 2 or 3b                | CVD + heart failure + CKD                                    | 165,617 (37%)                                                                          | 13,8545 / 165,617 = 8%                                                                 |
| All indications combined    |                                                              |                                                                                        |                                                                                        |
| 1 or 2 or 3b or 4           | All indications combined                                     | 245,467 (55%)                                                                          | 33,788 / 245,467 = 14%                                                                 |

Indication (3a) is a subset of (3b). Indication (3a) reflects trial inclusion criteria of the CREDENCE and DAPA-CKD trials, while indication (3b) reflects a broader definition of CKD for SGLT2i eligibility adopted in the Diabetes Canada and KDIGO Diabetic Kidney Disease guidelines. CKD stage  $\geq 2$  refers to eGFR  $< 90$  mL/min/1.73m<sup>2</sup>. CKD stage  $\geq 3$  refers to eGFR  $< 60$  mL/min/1.73m<sup>2</sup>.

Table 4: Logistic regression of current SGLT2i use in adults with diabetes

| Variable                                            |                          | OR (95% CI)      | P-value |
|-----------------------------------------------------|--------------------------|------------------|---------|
| CKD indication                                      |                          | 0.91 (0.88-0.95) | <0.001  |
| <b>Sociodemographics</b>                            |                          |                  |         |
| Sex                                                 | Female                   | 0.73 (0.71-0.75) | <0.001  |
| Age                                                 | <= 44 years              | 0.59 (0.56-0.62) | <0.001  |
|                                                     | 45-54 years              | 0.98 (0.95-1.02) | 0.278   |
|                                                     | 55-64 years (REF)        | 1.00 (1.00-1.00) | .       |
|                                                     | 65-74 years              | 0.79 (0.76-0.81) | <0.001  |
|                                                     | 75-84 years              | 0.38 (0.36-0.40) | <0.001  |
| >= 85 years                                         |                          | 0.13 (0.12-0.15) | <0.001  |
|                                                     | 1                        | 0.81 (0.78-0.85) | <0.001  |
|                                                     | 2                        | 0.93 (0.90-0.97) | 0.001   |
|                                                     | 3                        | 0.94 (0.90-0.98) | 0.003   |
|                                                     | 4                        | 1.00 (0.96-1.05) | 0.864   |
| 5 (REF)                                             | 1.00 (1.00-1.00)         | .                |         |
| <b>Comorbidities and diabetes</b>                   |                          |                  |         |
| Heart failure                                       |                          | 0.91 (0.86-0.96) | 0.001   |
| Coronary artery disease                             |                          | 1.18 (1.14-1.21) | <0.001  |
| Stroke                                              |                          | 0.94 (0.90-0.98) | 0.004   |
| Elixhauser index (per 5 units)                      |                          | 0.94 (0.94-0.95) | <0.001  |
| HbA1c                                               | <= 7.0%                  | 0.23 (0.22-0.23) | <0.001  |
|                                                     | > 7.0% and <= 9.0% (REF) | 1.00             | .       |
|                                                     | > 9.0%                   | 0.76 (0.74-0.79) | <0.001  |
| Insulin                                             | Basal insulin only       | 2.42 (2.34-2.50) | <0.001  |
|                                                     | Bolus +/- basal insulin  | 1.27 (1.22-1.32) | <0.001  |
| <b>Health care utilization in the previous year</b> |                          |                  |         |
| FP visits                                           | No FP visits (REF)       | 1.00 (1.00-1.00) | .       |
|                                                     | 1-4 FP visits            | 4.61 (4.25-5.01) | <0.001  |
|                                                     | >4 FP visits             | 5.82 (5.36-6.31) | <0.001  |
| Nephrologist                                        | >= 1 visit               | 0.73 (0.67-0.80) | <0.001  |
| Cardiologist                                        | >= 1 visit               | 1.27 (1.21-1.32) | <0.001  |
| Internist                                           | >= 1 visit               | 1.65 (1.60-1.70) | <0.001  |
| Endocrinologist                                     | >= 1 visit               | 2.46 (2.31-2.63) | <0.001  |
| Hospital admission                                  | >= 1 admission           | 0.66 (0.63-0.69) | <0.001  |

Rural residence originally included in the sociodemographics block but was dropped due to OR close to 1.00 and  $p > 0.05$  when examined with other variables in that block. Abbreviations: OR – odds ratio (adjusted simultaneously for all other reported variables). 95% CI – 95% confidence interval. DM – diabetes. CKD – chronic kidney disease. REF – reference group or level. HbA1c – hemoglobin A1c / glycated hemoglobin. FP – family physician

1  
2  
3  
4  
5  
6  
7  
8 SGLT2i use in patients with chronic kidney disease: Identifying challenges and opportunities for  
9 diffusion of an effective treatment  
10

11 Darren Lau MD/PhD FRCPC, Neesh Pannu MD SM FRCPC, Nairne Scott-Douglas MD PhD FRCPC,  
12 Rose Yeung MD MSc FRCPC, Scott Klarenbach MD MSc FRCPC  
13  
14  
15

16 **SUPPLEMENTAL MATERIALS**  
17  
18  
19  
20  
21  
22  
23  
24  
25  
26  
27  
28  
29  
30  
31  
32  
33  
34  
35  
36  
37  
38  
39  
40  
41  
42  
43  
44  
45  
46  
47  
48  
49  
50  
51  
52  
53  
54  
55  
56  
57  
58  
59  
60

Confidential

### Administrative Databases Used

We performed a cross-sectional study using administrative databases of Alberta Health and Alberta Health Services, in the Canadian province of Alberta. The specific databases used were Population Registry, Vital Statistics – Deaths, Practitioner Claims, Ambulatory Care, Discharge Abstract Database, laboratory results repository, and Pharmaceutical Information Network (PIN) database. The Ambulatory Care database captures visits to the Emergency Department and other health care facilities for day procedures. While pharmaceuticals are not universally funded in Alberta, all point-of-sale drug dispensations are uploaded to PIN from Alberta pharmacies, with over > 95% participation since 2008.

### Supplement Table S1: Classification of proteinuria

| Proteinuria severity | UACR           | UPCR           | Semi-quantitative dipstick |
|----------------------|----------------|----------------|----------------------------|
| None / mild          | <3 mg/mmol     | <15 mg/mmol    | Negative or trace          |
| Moderate             | 3-30 mg/mmol   | 15-50 mg/mmol  | 1+                         |
| Severe               | 31-220 mg/mmol | 51-359 mg/mmol | 2+ or 3+                   |
| Nephrotic range      | > 220 mg/mmol  | > 350 mg/mmol  | 4+                         |

UACR – Spot urine albumin-to-creatinine ratio

UPCR – Spot urine protein-to-creatinine ratio
